# Supplementary material for: Mutations of KRAS/NRAS/BRAF predict cetuximab resistance in metastatic colorectal cancer patients
Source: PubMed Central journal article supplement (PMC5008360; doi:10.18632/oncotarget.8076), 2016-03-12
Supplement: oncotarget-07-22257-s001.pdf [file oncotarget-07-22257-s001.pdf]

## Mutations of *KRAS/NRAS/BRAF* predict cetuximab resistance in metastatic colorectal cancer patients

### Supplementary Materials

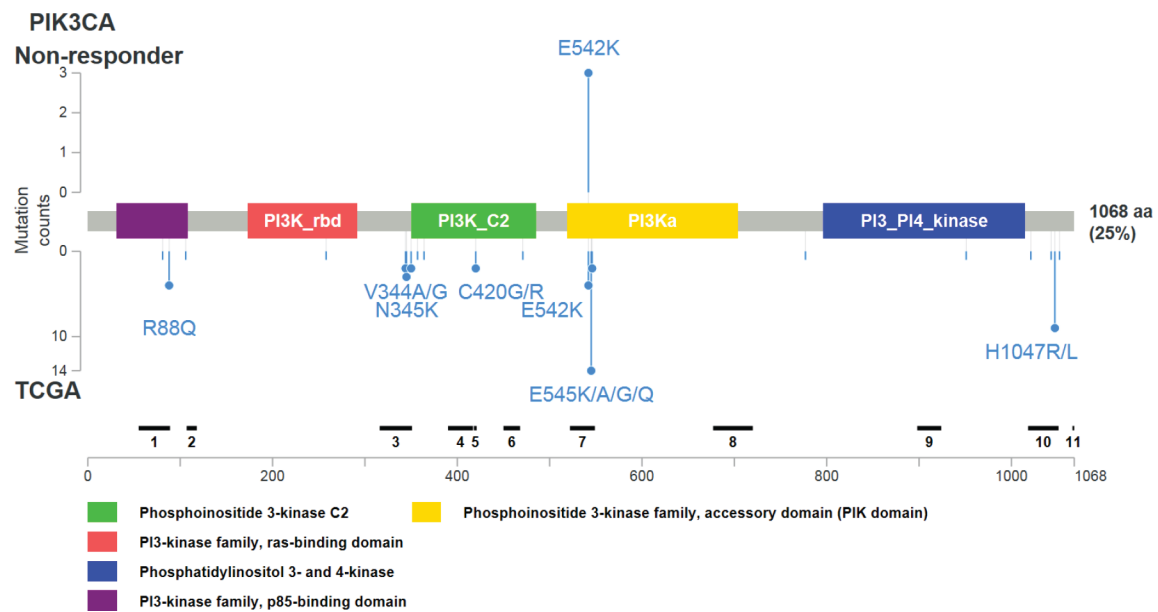

**Supplementary Figure S1: Distribution of *PIK3CA* genetic alterations detected in the non-responder group.** Schematic representation of the protein structure of *PIK3CA*. The upper panel indicates the genetic alterations detected in the non-responder group. The lower panel indicates the mutation spectrum in The Cancer Genome Atlas (TCGA) colorectal cancer dataset. The left scale indicates the number of cases. The blue, yellow, red, and purple circles indicate missense mutations, insertions/deletions, nonsense mutations, and multiple types of mutations, respectively.

**Supplementary Table S1: Genomic regions sequenced**

| Gene name | chromosome | Amplicon start | Amplicon end | Transcript ID   | Exon | Exon length | Exon start | Exon end  |
|-----------|------------|----------------|--------------|-----------------|------|-------------|------------|-----------|
| AKT1      | chr14      | 105241434      | 105241519    | ENST00000554581 | 5    | 132         | 105241413  | 105241544 |
| AKT1      | chr14      | 105246446      | 105246583    | ENST00000554581 | 2    | 129         | 105246425  | 105246553 |
| BRAF      | chr7       | 140453103      | 140453221    | ENST00000288602 | 15   | 119         | 140453075  | 140453193 |
| BRAF      | chr7       | 140481392      | 140481515    | ENST00000288602 | 11   | 118         | 140481376  | 140481493 |
| EGFR      | chr7       | 55211045       | 55211126     | ENST00000275493 | 3    | 184         | 55210998   | 55211181  |
| EGFR      | chr7       | 55221793       | 55221919     | ENST00000275493 | 7    | 142         | 55221704   | 55221845  |
| EGFR      | chr7       | 55232963       | 55233053     | ENST00000275493 | 15   | 158         | 55232973   | 55233130  |
| EGFR      | chr7       | 55241636       | 55241729     | ENST00000275493 | 18   | 123         | 55241614   | 55241736  |
| EGFR      | chr7       | 55242412       | 55242540     | ENST00000275493 | 19   | 99          | 55242415   | 55242513  |
| EGFR      | chr7       | 55248966       | 55249090     | ENST00000275493 | 20   | 186         | 55248986   | 55249171  |
| EGFR      | chr7       | 55249123       | 55249245     | ENST00000275493 | 20   | 186         | 55248986   | 55249171  |
| EGFR      | chr7       | 55259508       | 55259628     | ENST00000275493 | 21   | 156         | 55259412   | 55259567  |
| ERBB2     | chr17      | 37880213       | 37880340     | ENST00000269571 | 19   | 99          | 37880165   | 37880263  |
| ERBB2     | chr17      | 37880954       | 37881061     | ENST00000269571 | 20   | 186         | 37880979   | 37881164  |
| ERBB2     | chr17      | 37881325       | 37881453     | ENST00000269571 | 21   | 156         | 37881302   | 37881457  |
| ERBB4     | chr2       | 212288905      | 212288990    | ENST00000342788 | 23   | 147         | 212288880  | 212289026 |
| ERBB4     | chr2       | 212530052      | 212530180    | ENST00000342788 | 15   | 155         | 212530048  | 212530202 |
| ERBB4     | chr2       | 212576800      | 212576910    | ENST00000342788 | 9    | 127         | 212576775  | 212576901 |
| ERBB4     | chr2       | 212578289      | 212578415    | ENST00000342788 | 8    | 114         | 212578260  | 212578373 |
| ERBB4     | chr2       | 212587134      | 212587239    | ENST00000342788 | 7    | 142         | 212587118  | 212587259 |
| ERBB4     | chr2       | 212589765      | 212589867    | ENST00000342788 | 6    | 119         | 212589801  | 212589919 |
| ERBB4     | chr2       | 212652720      | 212652806    | ENST00000342788 | 4    | 135         | 212652750  | 212652884 |
| ERBB4     | chr2       | 212812076      | 212812169    | ENST00000342788 | 3    | 187         | 212812155  | 212812341 |
| HRAS      | chr11      | 533813         | 533930       | ENST00000451590 | 3    | 179         | 533766     | 533944    |
| HRAS      | chr11      | 534221         | 534308       | ENST00000451590 | 2    | 164         | 534212     | 534375    |
| KRAS      | chr12      | 25378550       | 25378658     | ENST00000311936 | 4    | 160         | 25378548   | 25378707  |
| KRAS      | chr12      | 25380261       | 25380364     | ENST00000311936 | 3    | 179         | 25380168   | 25380346  |
| KRAS      | chr12      | 25398187       | 25398304     | ENST00000311936 | 2    | 122         | 25398208   | 25398329  |
| NRAS      | chr1       | 115252186      | 115252269    | ENST00000369535 | 4    | 160         | 115252190  | 115252349 |
| NRAS      | chr1       | 115256505      | 115256584    | ENST00000369535 | 3    | 179         | 115256421  | 115256599 |
| NRAS      | chr1       | 115258690      | 115258774    | ENST00000369535 | 2    | 128         | 115258671  | 115258798 |
| PIK3CA    | chr3       | 178916776      | 178916881    | ENST00000263967 | 2    | 428         | 178916538  | 178916965 |
| PIK3CA    | chr3       | 178916932      | 178917035    | ENST00000263967 | 2    | 428         | 178916538  | 178916965 |
| PIK3CA    | chr3       | 178921465      | 178921570    | ENST00000263967 | 5    | 246         | 178921332  | 178921577 |
| PIK3CA    | chr3       | 178927406      | 178927525    | ENST00000263967 | 7    | 106         | 178927383  | 178927488 |
| PIK3CA    | chr3       | 178927902      | 178927986    | ENST00000263967 | 8    | 153         | 178927974  | 178928126 |
| PIK3CA    | chr3       | 178928070      | 178928160    | ENST00000263967 | 8    | 153         | 178927974  | 178928126 |

|        |       |           |           |                 |    |      |           |           |
|--------|-------|-----------|-----------|-----------------|----|------|-----------|-----------|
| PIK3CA | chr3  | 178936024 | 178936105 | ENST00000263967 | 10 | 125  | 178935998 | 178936122 |
| PIK3CA | chr3  | 178938788 | 178938918 | ENST00000263967 | 14 | 172  | 178938774 | 178938945 |
| PIK3CA | chr3  | 178947819 | 178947896 | ENST00000263967 | 19 | 118  | 178947792 | 178947909 |
| PIK3CA | chr3  | 178951997 | 178952097 | ENST00000263967 | 21 | 6000 | 178951882 | 178957881 |
| PIK3CA | chr3  | 178952141 | 178952237 | ENST00000263967 | 21 | 6000 | 178951882 | 178957881 |
| PTEN   | chr10 | 89624208  | 89624300  | ENST00000371953 | 1  | 1436 | 89622870  | 89624305  |
| PTEN   | chr10 | 89685259  | 89685374  | ENST00000371953 | 3  | 45   | 89685270  | 89685314  |
| PTEN   | chr10 | 89692814  | 89692920  | ENST00000371953 | 5  | 239  | 89692770  | 89693008  |
| PTEN   | chr10 | 89711805  | 89711932  | ENST00000371953 | 6  | 142  | 89711875  | 89712016  |
| PTEN   | chr10 | 89717504  | 89717620  | ENST00000371953 | 7  | 167  | 89717610  | 89717776  |
| PTEN   | chr10 | 89717667  | 89717780  | ENST00000371953 | 7  | 167  | 89717610  | 89717776  |
| PTEN   | chr10 | 89720696  | 89720747  | ENST00000371953 | 8  | 225  | 89720651  | 89720875  |
| PTEN   | chr10 | 89720785  | 89720900  | ENST00000371953 | 8  | 225  | 89720651  | 89720875  |
| TP53   | chr17 | 7573924   | 7574035   | ENST00000269305 | 10 | 107  | 7573927   | 7574033   |
| TP53   | chr17 | 7577016   | 7577151   | ENST00000269305 | 8  | 137  | 7577019   | 7577155   |
| TP53   | chr17 | 7577509   | 7577612   | ENST00000269305 | 7  | 110  | 7577499   | 7577608   |
| TP53   | chr17 | 7578181   | 7578298   | ENST00000269305 | 6  | 113  | 7578177   | 7578289   |
| TP53   | chr17 | 7578353   | 7578483   | ENST00000269305 | 5  | 184  | 7578371   | 7578554   |
| TP53   | chr17 | 7578517   | 7578601   | ENST00000269305 | 5  | 184  | 7578371   | 7578554   |
| TP53   | chr17 | 7579351   | 7579485   | ENST00000269305 | 4  | 279  | 7579312   | 7579590   |
| TP53   | chr17 | 7579854   | 7579960   | ENST00000269305 | 2  | 102  | 7579839   | 7579940   |

**Supplementary Table S2: Run stats**

| Sample ID | Total read | On target reads | Mean depth | Uniformity |
|-----------|------------|-----------------|------------|------------|
| A00006    | 925297     | 97%             | 4007       | 99%        |
| A00007    | 817417     | 95%             | 3489       | 98%        |
| A00008    | 2583251    | 98%             | 11060      | 95%        |
| A00009    | 2379819    | 97%             | 10193      | 94%        |
| A00011    | 2685576    | 98%             | 11740      | 90%        |
| A00013    | 3508536    | 98%             | 15564      | 94%        |
| A00014    | 3025868    | 98%             | 13452      | 97%        |
| A00015    | 624371     | 98%             | 2625       | 90%        |
| A00018    | 1022074    | 96%             | 4469       | 97%        |
| A00019    | 969377     | 97%             | 4232       | 97%        |
| A00020    | 842484     | 96%             | 3622       | 98%        |
| A00021    | 1046358    | 97%             | 4522       | 94%        |
| A00022    | 869059     | 96%             | 3755       | 96%        |
| A00023    | 1693608    | 94%             | 6595       | 79%        |
| A00024    | 1005872    | 98%             | 4444       | 96%        |
| A00025    | 919478     | 96%             | 4041       | 97%        |
| A00026    | 1000694    | 98%             | 4332       | 95%        |
| A00027    | 827929     | 98%             | 3612       | 97%        |
| A00029    | 16351460   | 97%             | 69863      | 91%        |
| A00032    | 4676967    | 95%             | 20108      | 96%        |
| A00035    | 3488703    | 96%             | 15075      | 91%        |
| A00037    | 4001072    | 98%             | 17716      | 94%        |
| A00041    | 1717151    | 90%             | 6342       | 78%        |
| A00046    | 744878     | 96%             | 3318       | 96%        |
| A00047    | 1114174    | 97%             | 4902       | 97%        |
| A00051    | 1132020    | 97%             | 4971       | 96%        |
| A00055    | 2607003    | 97%             | 10809      | 80%        |
| A00074    | 2197841    | 99%             | 9803       | 93%        |
| A00075    | 2038598    | 98%             | 9091       | 96%        |
| A00076    | 2219380    | 98%             | 9752       | 97%        |
| A00078    | 2503603    | 99%             | 11168      | 98%        |
| A00079    | 2016868    | 97%             | 8894       | 97%        |
| A00080    | 3443267    | 99%             | 15403      | 91%        |
| A00082    | 4664267    | 98%             | 20638      | 96%        |
| A00083    | 2028064    | 98%             | 9024       | 98%        |
| A00084    | 2529958    | 99%             | 11428      | 88%        |
| A00085    | 2362093    | 98%             | 10478      | 96%        |
| A00086    | 2599838    | 94%             | 11056      | 97%        |

|        |         |     |       |     |
|--------|---------|-----|-------|-----|
| A00087 | 2590460 | 98% | 11558 | 90% |
| A00089 | 2720412 | 99% | 12064 | 90% |
| A00090 | 2807721 | 99% | 12574 | 96% |
| A00091 | 2281861 | 96% | 10013 | 95% |
| A00092 | 2712699 | 98% | 12014 | 96% |
| A00170 | 1475920 | 98% | 6295  | 94% |
| A00172 | 807488  | 98% | 3475  | 99% |
| A00173 | 667340  | 97% | 2794  | 94% |
| A00178 | 398841  | 97% | 1656  | 95% |
| A00181 | 771966  | 98% | 3408  | 97% |
| A00184 | 736618  | 97% | 3131  | 90% |
| A00185 | 810426  | 95% | 3405  | 91% |
| A00187 | 821805  | 98% | 3567  | 93% |
| A00188 | 733742  | 96% | 3062  | 95% |
| A00189 | 540782  | 97% | 2343  | 90% |

**Supplementary Table S3: List of mutations**

| Gene   | Exon | cds change   | aa change | mutation type           | Chr   | Position  | NM_ID     | Reference | Variant | Variant frequency | Variant counts | Reference counts | Total depth | Sample |
|--------|------|--------------|-----------|-------------------------|-------|-----------|-----------|-----------|---------|-------------------|----------------|------------------|-------------|--------|
| AKT1   | 2    | c.49G > A    | p.E17K    | missense, splice_region | chr14 | 105246551 | NM_005163 | C         | T       | 27.9%             | 546            | 1414             | 1960        | A00021 |
| BRAF   | 11   | c.1397G > C  | p.G466A   | missense                | chr7  | 140481411 | NM_004333 | C         | G       | 38.1%             | 761            | 1235             | 1996        | A00085 |
| BRAF   | 11   | c.1406G > C  | p.G469A   | missense                | chr7  | 140481402 | NM_004333 | C         | G       | 19.7%             | 388            | 1577             | 1965        | A00021 |
| BRAF   | 11   | c.1406G > C  | p.G469A   | missense                | chr7  | 140481402 | NM_004333 | C         | G       | 28.1%             | 557            | 1425             | 1982        | A00082 |
| BRAF   | 15   | c.1781A > G  | p.D594G   | missense                | chr7  | 140453154 | NM_004333 | T         | C       | 26.7%             | 300            | 825              | 1125        | A00026 |
| BRAF   | 15   | c.1799T > A  | p.V600E   | missense                | chr7  | 140453136 | NM_004333 | A         | T       | 32.4%             | 641            | 1339             | 1980        | A00083 |
| BRAF   | 15   | c.1799T > A  | p.V600E   | missense                | chr7  | 140453136 | NM_004333 | A         | T       | 17.8%             | 353            | 1630             | 1984        | A00091 |
| KRAS   | 3    | c.182A > T   | p.Q61L    | missense                | chr12 | 25380276  | NM_004985 | T         | A       | 9.3%              | 186            | 1812             | 1998        | A00032 |
| KRAS   | 3    | c.182A > T   | p.Q61L    | missense                | chr12 | 25380276  | NM_004985 | T         | A       | 54.5%             | 1085           | 907              | 1992        | A00185 |
| KRAS   | 3    | c.183A > C   | p.Q61H    | missense                | chr12 | 25380275  | NM_004985 | T         | G       | 36.8%             | 733            | 1261             | 1994        | A00187 |
| KRAS   | 4    | c.436G > A   | p.A146T   | missense                | chr12 | 25378562  | NM_004985 | C         | T       | 18.2%             | 363            | 1636             | 1999        | A00013 |
| KRAS   | 4    | c.436G > A   | p.A146T   | missense                | chr12 | 25378562  | NM_004985 | C         | T       | 10.7%             | 92             | 769              | 861         | A00178 |
| NRAS   | 2    | c.34G > T    | p.G12C    | missense                | chr1  | 115258748 | NM_002524 | C         | A       | 6.8%              | 136            | 1853             | 1989        | A00080 |
| NRAS   | 2    | c.35G > C    | p.G12A    | missense                | chr1  | 115258747 | NM_002524 | C         | G       | 23.4%             | 466            | 1529             | 1995        | A00011 |
| NRAS   | 2    | c.38G > A    | p.G13D    | missense                | chr1  | 115258744 | NM_002524 | C         | T       | 41.7%             | 834            | 1166             | 2000        | A00085 |
| NRAS   | 3    | c.181C > A   | p.Q61K    | missense                | chr1  | 115256530 | NM_002524 | G         | T       | 47.1%             | 931            | 1044             | 1975        | A00188 |
| PIK3CA | 10   | c.1624G > A  | p.E542K   | missense                | chr3  | 178936082 | NM_006218 | G         | A       | 15.6%             | 291            | 1571             | 1862        | A00026 |
| PIK3CA | 10   | c.1624G > A  | p.E542K   | missense                | chr3  | 178936082 | NM_006218 | G         | A       | 22.3%             | 439            | 1526             | 1965        | A00090 |
| PIK3CA | 10   | c.1624G > A  | p.E542K   | missense                | chr3  | 178936082 | NM_006218 | G         | A       | 31.0%             | 612            | 1362             | 1974        | A00172 |
| PIK3CA | 10   | c.1624G > A  | p.E542K   | missense                | chr3  | 178936082 | NM_006218 | G         | A       | 31.0%             | 608            | 1356             | 1964        | A00187 |
| PIK3CA | 10   | c.1633G > A  | p.E545K   | missense                | chr3  | 178936091 | NM_006218 | G         | A       | 7.4%              | 147            | 1837             | 1984        | A00041 |
| PIK3CA | 21   | c.3136G > A  | p.A1046T  | missense                | chr3  | 178952081 | NM_006218 | G         | A       | 16.3%             | 323            | 1659             | 1982        | A00076 |
| PTEN   | -    | c.209+5G > A | -         | splice_region           | chr10 | 89685319  | NM_000314 | G         | A       | 43.2%             | 858            | 1127             | 1985        | A00078 |
| PTEN   | 6    | c.527A > G   | p.Y176C   | missense                | chr10 | 89711909  | NM_000314 | A         | G       | 52.3%             | 1007           | 917              | 1924        | A00046 |
| TP53   | 5    | c.451C > A   | p.P151T   | missense                | chr17 | 7578479   | NM_000546 | G         | T       | 34.4%             | 686            | 1309             | 1995        | A00046 |
| TP53   | 5    | c.481G > A   | p.A161T   | missense                | chr17 | 7578449   | NM_000546 | C         | T       | 42.4%             | 819            | 1114             | 1933        | A00027 |
| TP53   | 5    | c.488A > G   | p.Y163C   | missense                | chr17 | 7578442   | NM_000546 | T         | C       | 18.6%             | 369            | 1615             | 1984        | A00024 |
| TP53   | 5    | c.503A > G   | p.H168R   | missense                | chr17 | 7578427   | NM_000546 | T         | C       | 5.0%              | 42             | 790              | 832         | A00041 |
| TP53   | 5    | c.517G > A   | p.V173M   | missense                | chr17 | 7578413   | NM_000546 | C         | T       | 42.7%             | 851            | 1029             | 1995        | A00022 |
| TP53   | 5    | c.517G > C   | p.V173L   | missense                | chr17 | 7578413   | NM_000546 | C         | G       | 5.8%              | 115            | 1029             | 1995        | A00022 |
| TP53   | 5    | c.524G > A   | p.R175H   | missense                | chr17 | 7578406   | NM_000546 | C         | T       | 32.6%             | 652            | 1345             | 1997        | A00013 |
| TP53   | 5    | c.524G > A   | p.R175H   | missense                | chr17 | 7578406   | NM_000546 | C         | T       | 35.4%             | 705            | 1287             | 1992        | A00046 |
| TP53   | 5    | c.524G > A   | p.R175H   | missense                | chr17 | 7578406   | NM_000546 | C         | T       | 24.5%             | 489            | 1508             | 1997        | A00076 |

|      |    |             |         |            |       |         |           |   |    |       |      |      |      |        |
|------|----|-------------|---------|------------|-------|---------|-----------|---|----|-------|------|------|------|--------|
| TP53 | 5  | c.524G > A  | p.R175H | missense   | chr17 | 7578406 | NM_000546 | C | T  | 46.5% | 928  | 1067 | 1996 | A00085 |
| TP53 | 5  | c.524G > A  | p.R175H | missense   | chr17 | 7578406 | NM_000546 | C | T  | 23.0% | 459  | 1536 | 1995 | A00091 |
| TP53 | 5  | c.524G > A  | p.R175H | missense   | chr17 | 7578406 | NM_000546 | C | T  | 72.7% | 1277 | 479  | 1756 | A00172 |
| TP53 | 5  | c.527G > A  | p.C176Y | missense   | chr17 | 7578403 | NM_000546 | C | T  | 67.3% | 1334 | 633  | 1983 | A00090 |
| TP53 | 5  | c.528C > A  | p.C176* | nonsense   | chr17 | 7578402 | NM_000546 | G | T  | 21.3% | 424  | 1568 | 1992 | A00021 |
| TP53 | 5  | c.537T > G  | p.H179Q | missense   | chr17 | 7578393 | NM_000546 | A | C  | 10.7% | 204  | 1698 | 1902 | A00087 |
| TP53 | 6  | c.574C > T  | p.Q192* | nonsense   | chr17 | 7578275 | NM_000546 | G | A  | 63.5% | 1146 | 659  | 1805 | A00023 |
| TP53 | 6  | c.577C > T  | p.H193Y | missense   | chr17 | 7578272 | NM_000546 | G | A  | 20.7% | 376  | 1442 | 1818 | A00025 |
| TP53 | 6  | c.577C > T  | p.H193Y | missense   | chr17 | 7578272 | NM_000546 | G | A  | 52.5% | 949  | 857  | 1806 | A00078 |
| TP53 | 6  | c.580C > T  | p.L194F | missense   | chr17 | 7578269 | NM_000546 | G | A  | 9.7%  | 171  | 1592 | 1763 | A00024 |
| TP53 | 6  | c.586C > T  | p.R196* | nonsense   | chr17 | 7578263 | NM_000546 | G | A  | 65.4% | 1299 | 687  | 1986 | A00037 |
| TP53 | 6  | c.610G > T  | p.E204* | nonsense   | chr17 | 7578239 | NM_000546 | C | A  | 11.2% | 203  | 1614 | 1817 | A00178 |
| TP53 | 6  | c.637C > T  | p.R213* | nonsense   | chr17 | 7578212 | NM_000546 | G | A  | 9.1%  | 178  | 1770 | 1948 | A00181 |
| TP53 | 6  | c.637C > T  | p.R213* | nonsense   | chr17 | 7578212 | NM_000546 | G | A  | 81.3% | 1365 | 314  | 1679 | A00188 |
| TP53 | 7  | c.714 dupT  | p.N239* | frameshift | chr17 | 7577566 | NM_000546 | T | TA | 11.2% | 222  | 1767 | 1989 | A00055 |
| TP53 | 7  | c.743G > A  | p.R248Q | missense   | chr17 | 7577538 | NM_000546 | C | T  | 42.9% | 835  | 1113 | 1948 | A00170 |
| TP53 | 8  | c.797G > A  | p.G266E | missense   | chr17 | 7577141 | NM_000546 | C | T  | 70.5% | 1410 | 589  | 1999 | A00084 |
| TP53 | 8  | c.817C > T  | p.R273C | missense   | chr17 | 7577121 | NM_000546 | G | A  | 40.3% | 798  | 1184 | 1982 | A00020 |
| TP53 | 8  | c.818G > A  | p.R273H | missense   | chr17 | 7577120 | NM_000546 | C | T  | 33.8% | 668  | 1309 | 1977 | A00074 |
| TP53 | 8  | c.818G > A  | p.R273H | missense   | chr17 | 7577120 | NM_000546 | C | T  | 51.6% | 731  | 686  | 1417 | A00185 |
| TP53 | 8  | c.820G > T  | p.V274F | missense   | chr17 | 7577118 | NM_000546 | C | A  | 34.6% | 689  | 1300 | 1989 | A00019 |
| TP53 | 8  | c.844C > T  | p.R282W | missense   | chr17 | 7577094 | NM_000546 | G | A  | 12.8% | 247  | 1688 | 1935 | A00089 |
| TP53 | 8  | c.845G > C  | p.R282P | missense   | chr17 | 7577093 | NM_000546 | C | G  | 19.3% | 385  | 1610 | 1995 | A00024 |
| TP53 | 8  | c.916C > T  | p.R306* | nonsense   | chr17 | 7577022 | NM_000546 | G | A  | 67.6% | 1351 | 647  | 1998 | A00035 |
| TP53 | 8  | c.916C > T  | p.R306* | nonsense   | chr17 | 7577022 | NM_000546 | G | A  | 38.9% | 307  | 483  | 790  | A00184 |
| TP53 | 10 | c.1024C > T | p.R342* | nonsense   | chr17 | 7574003 | NM_000546 | G | A  | 27.7% | 553  | 1447 | 2000 | A00007 |
| TP53 | 10 | c.1024C > T | p.R342* | nonsense   | chr17 | 7574003 | NM_000546 | G | A  | 30.1% | 602  | 1397 | 1999 | A00075 |
| TP53 | 10 | c.1024C > T | p.R342* | nonsense   | chr17 | 7574003 | NM_000546 | G | A  | 42.4% | 366  | 497  | 863  | A00189 |
